# Supplementary material
Source: ML conference proceedings conference paper supplement (https://openreview.net/forum?id=hKise4AJgp)
Supplement: supplementary_material [file MoE-TMLR-camera-ready-appendices.pdf › MoE-TMLR-camera-ready-appendices.pdf]

## A Detailed Hyperparameters

We train all models with distributed data parallel (DDP) across devices and expert-parallelism within layers using Tutel (Hwang et al., 2023b) for efficient MoE implementation.

| Hyperparameter<br>Dataset  | ViT <a href="#">Touvron et al. (2022)</a> |                     | ConvNeXt <a href="#">Liu et al. (2022)</a> |                     |
|----------------------------|-------------------------------------------|---------------------|--------------------------------------------|---------------------|
|                            | IN1k                                      | IN22k               | IN1k                                       | IN21k               |
| Batch size                 | 2048                                      | 2048                | 2048                                       | 2048                |
| Optimizer                  | LAMB                                      | LAMB                | AdamW                                      | AdamW               |
| LR                         | $3 \cdot 10^{-3}$                         | $2.5 \cdot 10^{-3}$ | $2.5 \cdot 10^{-3}$                        | $2.5 \cdot 10^{-3}$ |
| LR decay                   | cosine                                    | cosine              | cosine                                     | cosine              |
| Weight decay               | 0.03                                      | 0.02                | 0.05                                       | 0.05                |
| Expert Weight d.           | 0.06                                      | 0.04                | 0.05                                       | 0.05                |
| Warmup epochs              | 5                                         | 5                   | 20                                         | 5                   |
| Load balancing             | 0.01                                      | 0.01                | 0.01                                       | 0.01                |
| Label smoothing $\epsilon$ | 0.0                                       | 0.1                 | 0.1                                        | 0.1                 |
| Stoch.Depth                | ✓                                         | ✓                   | ✓                                          | ✓                   |
| RepeatedAug                | ✓                                         | ✗                   | ✗                                          | ✗                   |
| H.flip                     | ✓                                         | ✓                   | ✓                                          | ✓                   |
| RRC                        | ✗                                         | ✓                   | ✗                                          | ✗                   |
| Rand Augment               | ✗                                         | ✗                   | ✓                                          | ✓                   |
| 3Augment                   | ✓                                         | ✓                   | ✗                                          | ✗                   |
| Color Jitter               | 0.3                                       | 0.3                 | ✗                                          | ✗                   |
| Mixup alpha                | 0.8                                       | 0.0                 | 0.8                                        | 0.0                 |
| Cutmix alpha               | 1.0                                       | 1.0                 | 1.0                                        | 1.0                 |
| Erasing prob.              | ✗                                         | ✗                   | 0.25                                       | ✗                   |
| Test crop ratio            | 1.0                                       | 1.0                 | 0.875                                      | 0.875               |
| Loss                       | BCE                                       | CE                  | CE                                         | CE                  |

Table 10: Summary of our training procedures with ImageNet-1k (IN1k) and ImageNet-21k (IN21k).

| Architecture               | ImageNet-1k     | ImageNet-21k    |
|----------------------------|-----------------|-----------------|
| ViT-(S/B)                  | 0.1 / 0.2       | 0.0 / 0.1       |
| ConvNext-(T/S/B)           | 0.1 / 0.3 / 0.6 | 0.0 / 0.0 / 0.1 |
| ConvNext-(T/B) <i>iso.</i> | 0.1 / 0.5       | -               |

## B MoE vs Dense Table

Table 11: Experiments with pretraining on ImageNet-21k, JFT-300M or JFT-3B: performance with/without MoE. In the case of ConvNeXt-T, we get 0.6 improvement, while increasing the number of parameters, but almost not the number of per-sample parameters. For ConvNeXt-S, there is a 0.3 improvement. There is an improvement for SwinV2 models, but these were starting lower. Overall, for strong/big models, there is no clear improvement. Results without citations correspond to our work. V-MoE results marked with a star (\*) are results taken from their GitHub ([tinyurl.com/yb8fze5u](https://tinyurl.com/yb8fze5u)). See Fig. 4 for an overview. For every model size examined, we present the accuracy metrics obtained after similar numbers of training iterations. Accuracy (Acc.) refers to Top-1 accuracy.

| Architecture                                   | Pre-train dataset | #Params<br>( $\times 10^6$ ) | Per samples<br>#Params <sub>act</sub> | IN-1K<br>Acc. |
|------------------------------------------------|-------------------|------------------------------|---------------------------------------|---------------|
| ViT-s/32(Riquelme et al., 2021)                | JFT-300M          | 36.5                         | 36.5                                  | 73.73         |
| ViT-s/32-32, Last 2(Riquelme et al., 2021)     | JFT-300M          | 166.7                        | $\approx 55$                          | 77.10         |
| ViT-s/32-32, Every 2(Riquelme et al., 2021)    | JFT-300M          | 296.9                        | $\approx 70$                          | 77.10         |
| ViT-S/16 (Touvron et al., 2022)                | ImageNet-21k      | 22.0                         | 22.0                                  | 82.6          |
| ViT-S/16-8 Every 2 Top 2                       | ImageNet-21k      | 71.7.6                       | 33.1                                  | 83.0          |
| ConvNeXt-T (Liu et al., 2022)                  | ImageNet-21k      | 28.6                         | 28.6                                  | 82.9          |
| ConvNeXt-T-8 Last 2 Top 1                      | ImageNet-21k      | 70.0                         | 28.7                                  | <b>83.5</b>   |
| SwinV2-S (Hwang et al., 2023a)                 | ImageNet-21k      | 65.8                         | -                                     | 83.5          |
| SwinV2-S-8 (Hwang et al., 2023a)               | ImageNet-21k      | 173.3                        | 65.8                                  | 84.5          |
| SwinV2-S-16 (Hwang et al., 2023a)              | ImageNet-21k      | 296.1                        | 65.8                                  | <b>84.9</b>   |
| SwinV2-S-32 (Hwang et al., 2023a)              | ImageNet-21k      | 296.1                        | 65.8                                  | 84.7          |
| ConvNeXt-S (Liu et al., 2022)                  | ImageNet-21k      | 50.3                         | -                                     | 84.6          |
| ConvNeXt-S-8 Last 2 Top 1                      | ImageNet-21k      | 91.6                         | 50.3                                  | <b>84.9</b>   |
| ViT-B/16 (Touvron et al., 2022)                | ImageNet-21k      | 86.6                         | 86.6                                  | 85.2          |
| ViT-B/16, Every 2, Top 2                       | ImageNet-21k      | 284.9                        | 129.9                                 | 85.2          |
| ViT-B/16 $\uparrow$ 384 (Touvron et al., 2022) | ImageNet-21k      | 86.6                         | 86.6                                  | 86.7          |
| ViT-B/16 (Zhai et al., 2022)                   | JFT-300M          | 86.6                         | 86.6                                  | 84.9          |
| ViT-B/16 (Riquelme et al., 2021)               | JFT-300M          | 100.5                        | 100.5                                 | 84.15         |
| V-MoE-B/16-32, Every 2 (Riquelme et al., 2021) | JFT-300M          | 979.0                        | $\approx 200$                         | 85.3          |
| V-MoE-B/16-32, Last 2 (Riquelme et al., 2021)  | JFT-300M          | 393.3                        | $\approx 110$                         | <b>85.4</b>   |
| SwinV2-B (Hwang et al., 2023a)                 | ImageNet-21k      | 109.3                        | 109.3                                 | 85.1          |
| SwinV2-B-8 (Hwang et al., 2023a)               | ImageNet-21k      | 300.3                        | 109.3                                 | 85.3          |
| SwinV2-B-16 (Hwang et al., 2023a)              | ImageNet-21k      | 518.7                        | 109.3                                 | <b>85.5</b>   |
| SwinV2-B-32 (Hwang et al., 2023a)              | ImageNet-21k      | 955.3                        | 109.3                                 | <b>85.5</b>   |
| ConvNeXt-B (Liu et al., 2022)                  | ImageNet-21k      | 88.6                         | 88.6                                  | <b>85.8</b>   |
| ConvNeXt-B-8                                   | ImageNet-21k      | 162.0                        | 88.6                                  | 85.7          |
| ViT-L/16 (Touvron et al., 2022)                | ImageNet-21k      | 304.4                        | 304.4                                 | 87.0          |
| ViT-L/16 (Zhai et al., 2022)                   | JFT-300M          | 323.1                        | 323.1                                 | <b>87.7</b>   |
| ViT-L/16 (Riquelme et al., 2021)               | JFT-300M          | 323.1                        | 323.1                                 | 87.1          |
| V-MoE-L/16-32, Every 2 (Riquelme et al., 2021) | JFT-300M          | 3446.0                       | $\approx 600$                         | 87.4          |
| V-MoE-L/16-32, Last 2 (Riquelme et al., 2021)  | JFT-300M          | 843.6                        | $\approx 380$                         | 87.5          |
| SoViT/14(Alabdulmohsin et al., 2023)           | JFT-3B            | 400                          | 400                                   | 90.3          |
| ViT-g/14(Zhai et al., 2022)                    | JFT-3B            | 1B                           | 1B                                    | <b>90.45</b>  |
| V-MoE/14 (Riquelme et al., 2021)               | JFT-3B            | 15B                          | $\approx 1B$                          | 90.35         |

**C Ade20k**

Table 12: ImageNet-1K trained models

| Backbone                                     | Input crop.<br>( $\times 10^6$ ) | #Params<br>#Params | per sample | Single scale<br>mIoU |
|----------------------------------------------|----------------------------------|--------------------|------------|----------------------|
| <b>ImageNet-1K trained models</b>            |                                  |                    |            |                      |
| ConvNeXt-T <a href="#">Liu et al. (2022)</a> | 512 <sup>2</sup>                 | 28.6               | -          | 46.0                 |
| ConvNeXt-T-4 Last 2 Top 1                    | 512 <sup>2</sup>                 | 34.5               | 25.6       | 46.0                 |
| ConvNeXt-S <a href="#">Liu et al. (2022)</a> | 512 <sup>2</sup>                 | 50                 | -          | 48.7                 |
| ConvNeXt-S-4 Last 2 Top 1                    | 512 <sup>2</sup>                 | 56.1               | 47.3       | 48.38                |
| ConvNeXt-B <a href="#">Liu et al. (2022)</a> | 512 <sup>2</sup>                 | 88.6               | -          | 49.1                 |
| ConvNeXt-B-4 Last 2 Top 1                    | 512 <sup>2</sup>                 | 99.1               | 83.4       | 48.8                 |
| ViT-S <a href="#">Touvron et al. (2022)</a>  | 512 <sup>2</sup>                 | 88.6               | -          | 45.8                 |
| ViT-S-8 Every 2 Top 2                        | 512 <sup>2</sup>                 | 99.1               | 83.4       | 45.4                 |
| ViT-B <a href="#">Touvron et al. (2022)</a>  | 512 <sup>2</sup>                 | 88.6               | -          | 49.0                 |
| ViT-B-8 Every 2 Top 2                        | 512 <sup>2</sup>                 | 99.1               | 83.4       | 48.3                 |
| <b>ImageNet-22K trained models</b>           |                                  |                    |            |                      |
| ConvNeXt-T <a href="#">Liu et al. (2022)</a> | 640 <sup>2</sup>                 | 28.6               | -          | 48.6                 |
| ConvNeXt-T-4 Last 2 Top 1                    | 640 <sup>2</sup>                 | 34.5               | 25.6       | 48.9                 |
| ConvNeXt-S <a href="#">Liu et al. (2022)</a> | 640 <sup>2</sup>                 | 50                 | -          | 51.0                 |
| ConvNeXt-S-4 Last 2 Top 1                    | 640 <sup>2</sup>                 | 56.1               | 47.3       | 50.8                 |
| ConvNeXt-B <a href="#">Liu et al. (2022)</a> | 640 <sup>2</sup>                 | 88.6               | -          | 52.6                 |
| ConvNeXt-B-4 Last 2 Top 1                    | 640 <sup>2</sup>                 | 99.1               | 83.4       | 52.0                 |
| ViT-S <a href="#">Touvron et al. (2022)</a>  | 640 <sup>2</sup>                 | 88.6               | -          | 48.4                 |
| ViT-S-8 Every 2 Top 2                        | 640 <sup>2</sup>                 | 99.1               | 83.4       | 48.7                 |
| ViT-B <a href="#">Touvron et al. (2022)</a>  | 640 <sup>2</sup>                 | 88.6               | -          | 52.8                 |
| ViT-B-8 Every 2 Top 2                        | 640 <sup>2</sup>                 | 99.1               | 83.4       | 52.4                 |
